# Supplementary material for: Effects of low skeletal muscle mass and sarcopenic obesity on albuminuria: a 7-year longitudinal study
Source: PubMed Central journal article supplement (PMC7113302; doi:10.1038/s41598-020-62841-y), 2020-04-01
Supplement: 41598_2020_62841_MOESM1_ESM.pdf [file 41598_2020_62841_MOESM1_ESM.pdf]

## **Supplementary information**

### **Effects of low skeletal muscle mass and sarcopenic obesity on albuminuria: a 7-year longitudinal study**

Jee Hee Yoo<sup>1,2\*</sup>, Gyuri Kim<sup>1\*</sup>, Sung Woon Park<sup>1</sup>, Min Sun Choi<sup>1</sup>, Jiyeon Ahn<sup>1</sup>, Sang-Man Jin<sup>1</sup>, Kyu Yeon Hur<sup>1</sup>, Moon-Kyu Lee<sup>1</sup>, Mira Kang<sup>3,4</sup>, Jae Hyeon Kim<sup>1</sup>

<sup>1</sup>Division of Endocrinology and Metabolism, Department of Medicine, Samsung Medical Center, Sungkyunkwan University School of Medicine, Seoul, Republic of Korea

<sup>2</sup>Department of Internal Medicine, Yonsei University Wonju College of Medicine, 20 Ilsan-ro, Wonju, 26426, Republic of Korea

<sup>3</sup>Department of Digital Health, SAIHST, Sungkyunkwan University, Seoul 06351, Republic of Korea

<sup>4</sup>Center for Health Promotion, Samsung Medical Center, Sungkyunkwan University School of Medicine, Seoul, Republic of Korea

## **Correspondence**

Jae Hyeon Kim

Division of Endocrinology and Metabolism,

Department of Medicine, Samsung Medical Center,

Sungkyunkwan University School of Medicine

81, Irwon-ro, Gangnam-gu, Seoul 06351, Republic of Korea

Email: [jaehyeonkim26@gmail.com](mailto:jaehyeonkim26@gmail.com)

Phone: [82-2-3410-1580](tel:82-2-3410-1580)

Mira Kang

Department of Health Promotion Center,

Samsung Medical Center,

Sungkyunkwan University School of Medicine,

81, Irwon-ro, Gangnam-gu, Seoul 06351, Republic of Korea

Email: [mira90.kang@samsung.com](mailto:mira90.kang@samsung.com)

**Table S1. Baseline characteristics according to sarcopenic obese status (according to WC and SMI)**

|                                        | <b>Body composition</b>         |                                   |                              |                                         | <b>P value</b> |
|----------------------------------------|---------------------------------|-----------------------------------|------------------------------|-----------------------------------------|----------------|
|                                        | <b>Optimal<br/>(n = 17,382)</b> | <b>Sarcopenic<br/>(n = 3,095)</b> | <b>Obese<br/>(n = 4,335)</b> | <b>Sarcopenic obese<br/>(n = 2,740)</b> |                |
| <b>Age, years (SD)</b>                 | 49.3 (7.5)                      | 53.2 (8.6)                        | 48.5 (7.2)                   | 50.6 (8.7)                              | < 0.001        |
| <b>Sex</b>                             |                                 |                                   |                              |                                         | < 0.001        |
| <b>Men, n (%)</b>                      | 9260 (61.2)                     | 511 (3.4)                         | 3840 (25.4)                  | 1514 (10.0)                             |                |
| <b>Women, n (%)</b>                    | 8122 (65.4)                     | 2584 (20.8)                       | 495 (4.0)                    | 1226 (9.9)                              |                |
| <b>Skeletal muscle mass index (SD)</b> | 31.9 (2.6)                      | 26.6 (1.9)                        | 31.4 (1.2)                   | 27.2 (2.5)                              | < 0.001        |
| <b>Men</b>                             | 33.5 (1.8)                      | 29.3 (1.1)                        | 31.6 (0.9)                   | 28.8 (1.1)                              |                |
| <b>Women</b>                           | 29.7 (1.8)                      | 25.8 (1.1)                        | 27.9 (0.6)                   | 24.3 (1.5)                              |                |
| <b>Body weight, kg (SD)</b>            | 63.7 (10.3)                     | 60.8 (8.4)                        | 85.3 (6.9)                   | 80.8 (10.8)                             | < 0.001        |
| <b>BMI, kg/m<sup>2</sup> (SD)</b>      | 22.7 (2.4)                      | 24.1 (2.0)                        | 28.6 (0.9)                   | 29.6 (2.1)                              | < 0.001        |
| <b>Waist circumference, cm (SD)</b>    | 80.8 (8.1)                      | 82.4 (7.4)                        | 95.5 (4.8)                   | 96.3 (7.4)                              | < 0.001        |
| <b>Current smoker, n (%)</b>           | 3117 (22.0)                     | 159 (5.9)                         | 1338 (41.2)                  | 528 (24.9)                              | < 0.001        |
| <b>Regular exercise, n (%)</b>         | 3170 (19.2)                     | 526 (18.2)                        | 583 (14.2)                   | 416 (16.5)                              | < 0.001        |
| <b>SBP, mmHg (SD)</b>                  | 115.6 (15.3)                    | 119.3 (16.2)                      | 123.3 (14.3)                 | 125.2 (15.5)                            | < 0.001        |
| <b>DBP, mmHg (SD)</b>                  | 72.6 (11.1)                     | 72.8 (10.9)                       | 78.1 (10.5)                  | 77.7 (10.6)                             | < 0.001        |
| <b>Total cholesterol, mg/dL (SD)</b>   | 194.6 (32.9)                    | 204.5 (35.4)                      | 197.4 (34.4)                 | 203.3 (36.7)                            | < 0.001        |
| <b>HDL-C, mg/dL (SD)</b>               | 57.0 (14.7)                     | 57.0 (13.9)                       | 46.5 (10.5)                  | 49.4 (11.7)                             | < 0.001        |

|                                                       |              |              |               |              |         |
|-------------------------------------------------------|--------------|--------------|---------------|--------------|---------|
| <b>Triglycerides, mg/dL (SD)</b>                      | 116.9 (71.5) | 125.6 (69.5) | 172.9 (107.7) | 162.4 (90.3) | < 0.001 |
| <b>LDL-C, mg/dL (SD)</b>                              | 121.6 (29.1) | 129.5 (31.3) | 127.2 (29.0)  | 130.8 (31.3) | < 0.001 |
| <b>Fasting glucose, mg/dL (SD)</b>                    | 93.2 (15.7)  | 95.5 (17.8)  | 100.1 (18.4)  | 101.9 (21.0) | < 0.001 |
| <b>HbA1c, % (SD)</b>                                  | 5.4 (0.6)    | 5.6 (0.6)    | 5.7 (0.7)     | 5.8 (0.8)    | < 0.001 |
| <b>CRP, mg/L (SD)</b>                                 | 0.11 (0.31)  | 0.14 (0.40)  | 0.14 (0.23)   | 0.18 (0.29)  | < 0.001 |
| <b>Insulin, uIU/mL (SD)</b>                           | 7.5 (3.9)    | 8.9 (4.1)    | 11.1 (5.4)    | 12.6 (6.4)   | < 0.001 |
| <b>C-peptide, ng/mL (SD)</b>                          | 1.62 (0.66)  | 1.83 (0.69)  | 2.50 (0.86)   | 2.63 (0.96)  | < 0.001 |
| <b>HOMA-IR (SD)</b>                                   | 1.76 (1.07)  | 2.14 (1.16)  | 2.76 (1.44)   | 3.23 (2.06)  | < 0.001 |
| <b>BUN, mg/dL (SD)</b>                                | 13.4 (3.4)   | 13.4 (3.4)   | 14.3 (3.4)    | 13.9 (3.4)   | < 0.001 |
| <b>Creatinine, mg/dL (SD)</b>                         | 0.88 (0.16)  | 0.78 (0.14)  | 1.00 (0.13)   | 0.88 (0.16)  | < 0.001 |
| <b>eGFR, mL/min per 1.73m<sup>2</sup> (SD)</b>        | 83.8 (13.0)  | 85.7 (14.0)  | 80.6 (11.9)   | 84.8 (13.7)  | < 0.001 |
| <b>Urinary albumin-to-creatinine ratio, mg/g (SD)</b> | 6.3 (5.3)    | 7.3 (5.8)    | 7.0 (6.2)     | 8.0 (6.3)    | < 0.001 |

*BMI* body mass index, *BUN* blood urea nitrogen, *CRP* c-reactive protein, *DBP* diastolic blood pressure, *eGFR* estimated glomerular filtration rate, *HDL-C* high-density lipoprotein cholesterol, *HOMA-IR* homeostasis model assessment of insulin resistance, *LDL-C* low-density lipoprotein cholesterol, *SBP* systolic blood pressure, *SD* standard deviation, *SMI* skeletal muscle mass index, *WC* waist circumference

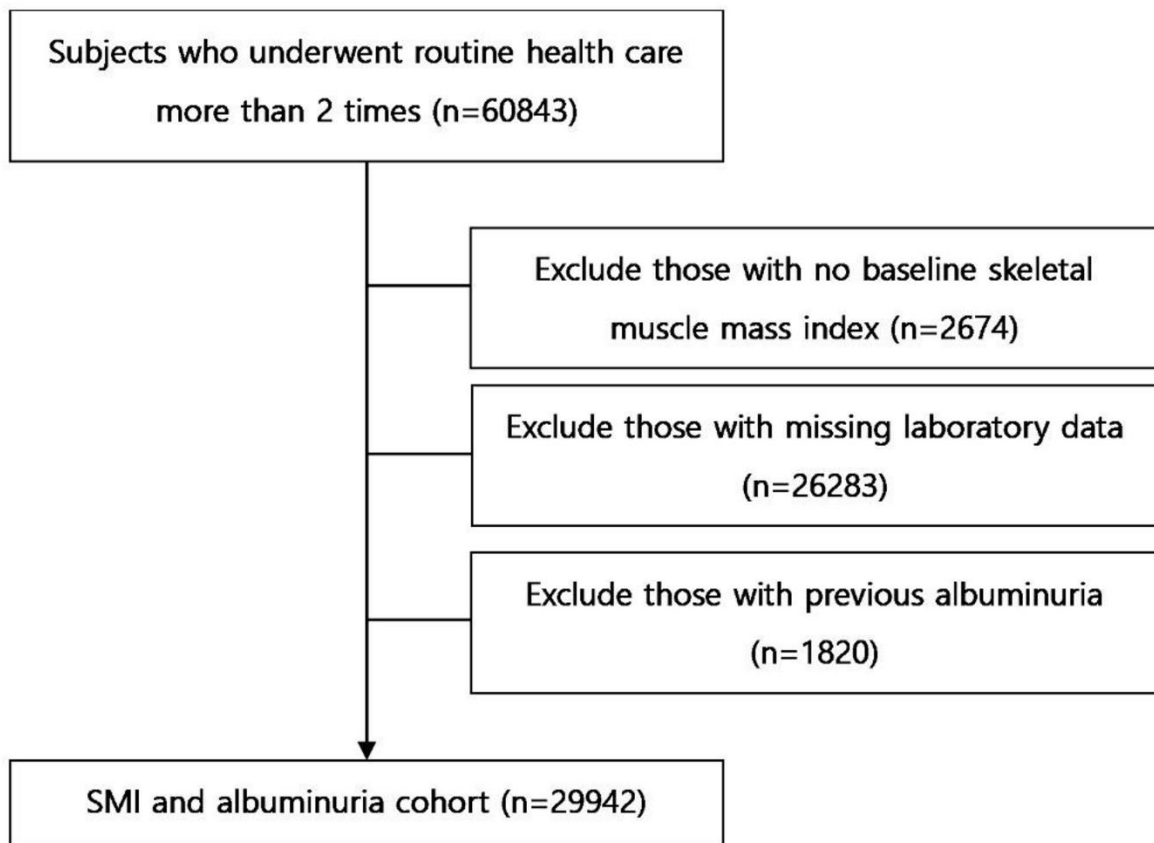

**Figure S1** Flowchart of numbers included in the study.
